# Supplementary material
Source: PubMed Central journal article supplement (PMC10039451)
Supplement: NIHMS1877512-supplement-Supplementary_Materials.pdf [file NIHMS1877512-supplement-Supplementary_Materials.pdf]

## Supplementary Information

1  
2  
3  
4  
5  
6  
7  
8  
9  
10  
11  
12  
13  
14  
15  
16

### **TP53, CDKN2A/P16, and NFE2L2/NRF2 regulate the incidence of pure- and combined-small cell lung cancer in mice**

Samera H. Hamad, Stephanie A. Montgomery, Jeremy M. Simon; Brittany M. Bowman, Kyle B. Spainhower, Ryan M. Murphy, Erik S. Knudsen, Suzanne E. Fenton, Scott H. Randell, Jeremiah R. Holt, D. Neil Hayes, Agnieszka K. Witkiewicz, Trudy G. Oliver, M. Ben Major\* and Bernard E. Weissman\*

#### **\*To whom the correspondence should be addressed**

M. Ben Major, PhD: Washington University in St. Louis, 660 Euclid Ave. Avenue Box 8228, St. Louis, MO 63110. Tel: 314-273-3675. Fax 314-362-7463 Email: [bmajor@wustl.edu](mailto:bmajor@wustl.edu)

Bernard E. Weissman, PhD: Lineberger Cancer Center, Room 31-322, University of North Carolina, Chapel Hill, NC, 27599-7295. Tel: 919-966-7533. Fax: 919-966-9673. Email: [weissman@med.unc.edu](mailto:weissman@med.unc.edu)

17 **Supplementary Data**

18

| <b>Supplementary Table 1a. Tumors observed in experiment #1</b>                          |           |            |                             |              |                        |                                         |
|------------------------------------------------------------------------------------------|-----------|------------|-----------------------------|--------------|------------------------|-----------------------------------------|
| <b>Genotype</b>                                                                          | <b>ID</b> | <b>Sex</b> | <b>Lung</b>                 | <b>Brain</b> | <b>Liver</b>           | <b>Other Tumors</b>                     |
| <b><i>Trp53<sup>fl/fl</sup>;p16<sup>fl/fl</sup>;Nrf2<sup>+/+</sup></i><br/>(n=19)</b>    | 117       | Female     | ND                          | ND           | ND                     |                                         |
|                                                                                          | 173       | Female     | ND                          | ND           | ND                     |                                         |
|                                                                                          | 174       | Female     | ND                          | ND           | ND                     |                                         |
|                                                                                          | 175       | Female     | ND                          | ND           | ND                     |                                         |
|                                                                                          | 200       | Female     | ND                          | ND           | ND                     | Salivary tumor                          |
|                                                                                          | 201       | Female     | ND                          | ND           | ND                     |                                         |
|                                                                                          | 202       | Female     | ND                          | ND           | ND                     |                                         |
|                                                                                          | 224       | Female     | ND                          | ND           | ND                     |                                         |
|                                                                                          | 170       | Male       | C-SCLC                      | ND           | Lymphoproliferative    | Lymphoma in Spleen                      |
|                                                                                          | 111       | Male       | Poorly differentiated tumor | NT           | NT                     |                                         |
|                                                                                          | 192       | Male       | Mets from PTT               | ND           | Mets from PTT          | Parathyroid tumor (PTT); salivary tumor |
|                                                                                          | 171       | Male       | ND                          | ND           | ND                     | SCC from Ear                            |
|                                                                                          | 199       | Male       | ND                          | ND           | ND                     | Salivary tumor                          |
|                                                                                          | 193       | Male       | ND                          | ND           | ND                     |                                         |
|                                                                                          | 194       | Male       | ND                          | ND           | ND                     |                                         |
|                                                                                          | 195       | Male       | ND                          | ND           | ND                     |                                         |
|                                                                                          | 198       | Male       | ND                          | ONB          | ND                     |                                         |
|                                                                                          | 222       | Male       | ND                          | ND           | ND                     |                                         |
| 982                                                                                      | Male      | ND         | ND                          | ND           |                        |                                         |
| <b><i>Trp53<sup>fl/fl</sup>;p16<sup>fl/fl</sup>;Nrf2<sup>E79Q/+</sup></i><br/>(n=18)</b> | 294       | Female     | C-SCLC                      | ONB          | Mets from lung         | Mets in Lymph node                      |
|                                                                                          | 218       | Female     | ND                          | ND           | ND                     | Spindle cell sarcoma                    |
|                                                                                          | 227       | Female     | ND                          | ONB          | ND                     |                                         |
|                                                                                          | 226       | Female     | ND                          | ND           | Lymphoma               | Lymphoma in lymph node                  |
|                                                                                          | 260       | Female     | ND                          | ND           | ND                     | SCC from Ear                            |
|                                                                                          | 261       | Female     | ND                          | ND           | ND                     |                                         |
|                                                                                          | 180       | Female     | ND                          | ND           | ND                     |                                         |
|                                                                                          | 181       | Female     | ND                          | ND           | ND                     |                                         |
|                                                                                          | 217       | Female     | ND                          | ND           | ND                     |                                         |
|                                                                                          | 296       | Female     | ND                          | ND           | ND                     |                                         |
|                                                                                          | 987       | Female     | ND                          | ND           | NT                     |                                         |
|                                                                                          | 291       | Male       | P-SCLC                      | ND           | ND                     |                                         |
|                                                                                          | 114       | Male       | P-SCLC                      | ND           | ND                     |                                         |
|                                                                                          | 179       | Male       | P-SCLC                      | ND           | ND                     |                                         |
|                                                                                          | 223       | Male       | ND                          | ND           | Hepatocellular adenoma |                                         |
|                                                                                          | 253       | Male       | ND                          | ND           | ND                     |                                         |
|                                                                                          | 254       | Male       | ND                          | ONB          | ND                     |                                         |
|                                                                                          | 302       | Male       | ND                          | ND           | ND                     |                                         |

Tumors and benign lesions developed in *Trp53<sup>fl/fl</sup>;p16<sup>fl/fl</sup>;Nrf2<sup>+/+</sup>* and *Trp53<sup>fl/fl</sup>;p16<sup>fl/fl</sup>;Nrf2<sup>E79Q/+</sup>* mice from Experiment #1: ND: None detected ; C-SCLC: Combined Small Cell Lung Cancer; NT: No tissue; PTT: Parathyroid tumor; SCC: Squamous Cell Carcinoma; ONB: Olfactory Neuroblastoma; P-SCLC: Pure Small Cell Lung Cancer. The darker shaded rows indicate invasive lung tumors, while the lighter shade indicates other types of lung tumors.

**Supplementary Table 1b. Tumors observed in experiment #2**

| Genotype                                                                                | ID  | Sex    | Lung                            | Brain | Liver          | Other Tumors                                                            |
|-----------------------------------------------------------------------------------------|-----|--------|---------------------------------|-------|----------------|-------------------------------------------------------------------------|
| <b><i>Trp53<sup>fl/fl</sup>;p16<sup>fl/fl</sup>;Nrf2<sup>+/+</sup></i></b><br>(n=19)    | 444 | Female | C-SCLC                          | ND    | ND             |                                                                         |
|                                                                                         | 445 | Female | C-SCLC                          | ND    | Mets from lung |                                                                         |
|                                                                                         | 451 | Female | C-SCLC                          | ONB   | ND             |                                                                         |
|                                                                                         | 456 | Female | C-SCLC                          | ONB   | ND             |                                                                         |
|                                                                                         | 446 | Female | P-SCLC                          | ND    | ND             | SCC from Skin; Mets in lymph node                                       |
|                                                                                         | 448 | Female | P-SCLC                          | ONB   | ND             |                                                                         |
|                                                                                         | 452 | Female | Poorly differentiated tumor     | NT    | ND             | Metastasis to diaphragm                                                 |
|                                                                                         | 436 | Female | ND                              | ONB   | ND             |                                                                         |
|                                                                                         | 455 | Female | ND                              | ND    | ND             |                                                                         |
|                                                                                         | 457 | Female | ND                              | ND    | ND             |                                                                         |
|                                                                                         | 432 | Male   | C-SCLC                          | ONB   | ND             |                                                                         |
|                                                                                         | 458 | Male   | C-SCLC                          | ND    | ND             |                                                                         |
|                                                                                         | 427 | Male   | P-SCLC                          | ND    | ND             |                                                                         |
|                                                                                         | 437 | Male   | P-SCLC                          | ONB   | ND             |                                                                         |
|                                                                                         | 440 | Male   | P-SCLC                          | ONB   | ND             |                                                                         |
|                                                                                         | 441 | Male   | ND                              | ONB   | ND             |                                                                         |
|                                                                                         | 431 | Male   | ND                              | ONB   | ND             |                                                                         |
|                                                                                         | 450 | Male   | ND                              | ND    | ND             |                                                                         |
|                                                                                         | 463 | Male   | ND                              | ONB   | ND             |                                                                         |
| <b><i>Trp53<sup>fl/fl</sup>;p16<sup>fl/fl</sup>;Nrf2<sup>E79Q/+</sup></i></b><br>(n=19) | 466 | Female | C-SCLC                          | ONB   | Mets from lung | ONB with local invasion                                                 |
|                                                                                         | 467 | Female | C-SCLC                          | ONB   | Mets from lung |                                                                         |
|                                                                                         | 610 | Female | C-SCLC                          | ND    | ND             |                                                                         |
|                                                                                         | 483 | Female | P-SCLC                          | ONB   | ND             |                                                                         |
|                                                                                         | 454 | Female | P-SCLC                          | ND    | ND             |                                                                         |
|                                                                                         | 609 | Female | P-SCLC                          | ONB   | ND             | Salivary gland tumor                                                    |
|                                                                                         | 449 | Female | Tumor-Unknown Origin            | ONB   | ND             |                                                                         |
|                                                                                         | 453 | Female | ND                              | ONB   | ND             |                                                                         |
|                                                                                         | 447 | Female | ND                              | ONB   | ND             |                                                                         |
|                                                                                         | 481 | Male   | P-SCLC                          | ND    | ND             |                                                                         |
|                                                                                         | 459 | Male   | C-SCLC                          | ND    | ND             |                                                                         |
|                                                                                         | 462 | Male   | C-SCLC                          | ND    | ND             |                                                                         |
|                                                                                         | 428 | Male   | C-SCLC                          | ND    | Mets from lung |                                                                         |
|                                                                                         | 641 | Male   | C-SCLC+ P-SCLC                  | ONB   | ND             | Salivary gland tumor; lung lymph node metastasis of lung adenocarcinoma |
|                                                                                         | 439 | Male   | P-SCLC                          | ND    | ND             |                                                                         |
|                                                                                         | 460 | Male   | P-SCLC                          | ND    | ND             |                                                                         |
|                                                                                         | 429 | Male   | P-SCLC                          | ND    | ND             |                                                                         |
|                                                                                         | 618 | Male   | P-SCLC                          | ND    | ND             |                                                                         |
|                                                                                         | 430 | Male   | Poorly differentiated neoplasia | ND    | ND             | Thymic Lymphoma                                                         |

Tumors and benign lesions developed in *Trp53<sup>fl/fl</sup>;p16<sup>fl/fl</sup>;Nrf2<sup>+/+</sup>* and *Trp53<sup>fl/fl</sup>;p16<sup>fl/fl</sup>;Nrf2<sup>E79Q/+</sup>* mice from Experiment #2: C-SCLC: Combined Small Cell Lung Cancer; ND: None detected; ONB: Olfactory Neuroblastoma; P-SCLC: Pure Cell Lung Cancer; SCC: Squamous Cell Carcinoma; NT: No Tissue. The darker shaded rows indicate invasive lung tumors, while the lighter shade indicates other types of lung tumors.

19  
20  
21  
22  
23  
24

25

| <b>Supplementary Table 2. Total numbers of pure small cell lung cancer (P-SCLC) found in mice used for serial sectioning of lung tissue</b> |                                   |                               |                                                                                                       |
|---------------------------------------------------------------------------------------------------------------------------------------------|-----------------------------------|-------------------------------|-------------------------------------------------------------------------------------------------------|
| <b>Experimental group (number of mice used to sectioning their lung tissue)</b>                                                             | <b>Number of mice with P-SCLC</b> | <b>Total number of P-SCLC</b> | <b>Average of survival after treatment with Ad-CMV-Cre, Average <math>\pm</math> SD (Range) weeks</b> |
| <i>Trp53<sup>fl/fl</sup>;p16<sup>fl/fl</sup>;Nrf2<sup>+/+</sup></i> (n=9)                                                                   | 4                                 | 27                            | 33 $\pm$ 15 (15 – 54)                                                                                 |
| <i>Trp53<sup>fl/fl</sup>;p16<sup>fl/fl</sup>;Nrf2<sup>E79Q/+</sup></i> (n=9)                                                                | 8                                 | 127                           | 24 $\pm$ 5 (16 – 33)                                                                                  |

26

27

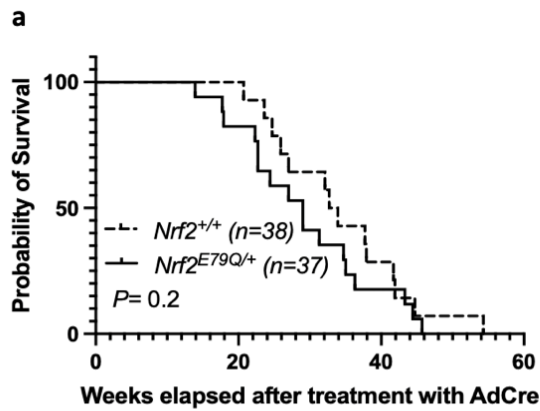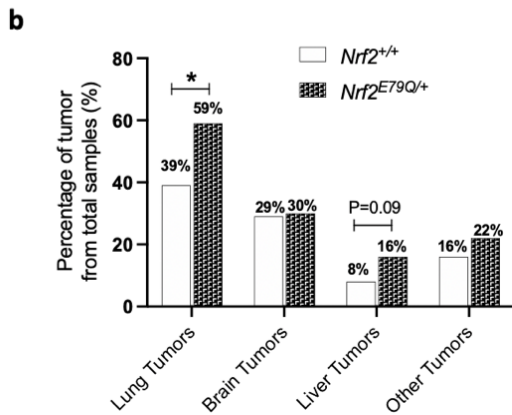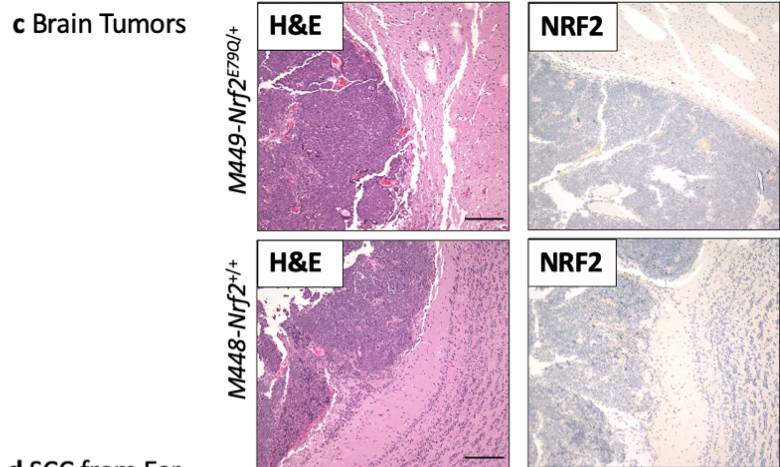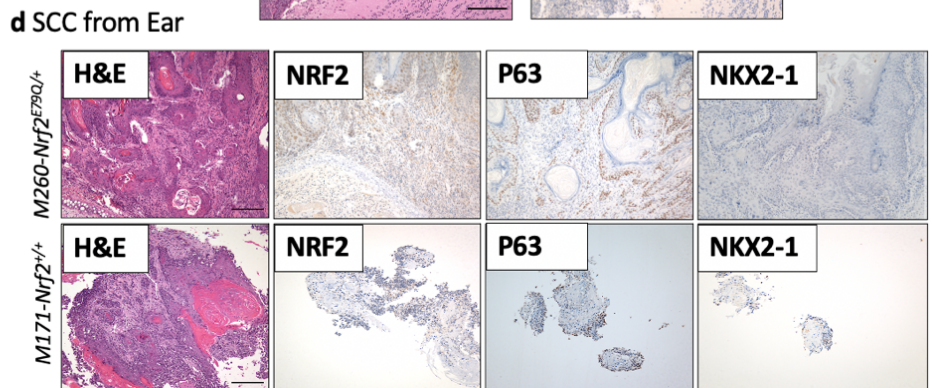

28  
 29  
 30  
 31  
 32  
 33  
 34  
 35  
 36  
 37  
 38  
 39  
 40  
 41  
 42  
 43  
 44  
 45  
 46  
 47  
 48  
 49  
 50

**Supplementary Fig. 1** **a** Survival curve of  $Trp53^{fl/fl};p16^{fl/fl};Nrf2^{+/+}$  versus  $Trp53^{fl/fl};p16^{fl/fl};Nrf2^{E79Q/+}$  mice (all mice) after treatment with Ad-CMV-Cre; **b** Percentages of tumors developed by  $Trp53^{fl/fl};p16^{fl/fl};Nrf2^{+/+}$  and  $Trp53^{fl/fl};p16^{fl/fl};Nrf2^{E79Q/+}$  mice, \* $P<0.05$ ; **c** H&E and NRF2 labeling of olfactory bulb neuroblastoma, scalebar=200 $\mu$ m; **d** H&E and representative IHC for NRF2, P63 and NKX2-1 of Squamous Cell Carcinoma (SCC) from ears in  $Trp53^{fl/fl};p16^{fl/fl};Nrf2^{+/+}$  and  $Trp53^{fl/fl};p16^{fl/fl};Nrf2^{E79Q/+}$  mice, scalebar=200 $\mu$ m. Images were taken using a BX61-Neville microscope.

51  
52

| <b>Positively Labelled Cells</b> |              | <b>Labelling Intensity</b> |              |
|----------------------------------|--------------|----------------------------|--------------|
| <b>Percent</b>                   | <b>Score</b> | <b>Intensity</b>           | <b>Score</b> |
| ≤ 5%                             | 0            | Absent                     | 0            |
| 6%-25%                           | 1            | Weak                       | 1            |
| 26%-50%                          | 2            | Moderate                   | 2            |
| 51%-75%                          | 3            | Strong                     | 3            |
| 76%-100%                         | 4            |                            |              |

53  
54  
55

56  
57

**Supplementary Table 4a. IHC score\* for markers in combined small cell lung cancer (C-SCLC) of *Trp53<sup>fl/fl</sup>;p16<sup>fl/fl</sup>;Nrf2<sup>E79Q/+</sup>* and *Trp53<sup>fl/fl</sup>;p16<sup>fl/fl</sup>;Nrf2<sup>+/+</sup>* mice; NT: No Tissue**

| Experimental Group           | ID  | NRF2                      |                     | NKX2-1                    |                     | P63                       |                     | SPC                       |                     | INSM1                     |                     | Phospho-RB1               |                     |
|------------------------------|-----|---------------------------|---------------------|---------------------------|---------------------|---------------------------|---------------------|---------------------------|---------------------|---------------------------|---------------------|---------------------------|---------------------|
|                              |     | Positively Labelled Cells | Labelling Intensity |
| <i>Nrf2<sup>+/+</sup></i>    | 170 | 0                         | 1                   | 3                         | 3                   | 0                         | 0                   | NT                        | NT                  | NT                        | NT                  | NT                        | NT                  |
|                              | 432 | 0                         | 0                   | 3                         | 3                   | 0                         | 0                   | NT                        | NT                  | NT                        | NT                  | NT                        | NT                  |
|                              | 444 | 0                         | 0                   | 3                         | 3                   | 0                         | 0                   | 0                         | 0                   | 4                         | 2                   | 1                         | 1                   |
|                              | 445 | 0                         | 0                   | 3                         | 3                   | 0                         | 0                   | 0                         | 0                   | 4                         | 2                   | 1                         | 3                   |
|                              | 456 | 0                         | 0                   | 3                         | 3                   | 0                         | 0                   | NT                        | NT                  | NT                        | NT                  | NT                        | NT                  |
|                              | 458 | 0                         | 0                   | 3                         | 3                   | 0                         | 0                   | 0                         | 0                   | 4                         | 3                   | 1                         | 2                   |
| <i>Nrf2<sup>E79Q/+</sup></i> | 294 | 0                         | 1                   | 4                         | 3                   | 0                         | 0                   | 0                         | 0                   | 3                         | 2                   | NT                        | NT                  |
|                              | 428 | 0                         | 0                   | 3                         | 3                   | 0                         | 0                   | 0                         | 0                   | 3                         | 2                   | 2                         | 3                   |
|                              | 459 | 0                         | 0                   | 3                         | 3                   | 0                         | 0                   | 0                         | 0                   | 4                         | 1                   | NT                        | NT                  |
|                              | 462 | 0                         | 0                   | 4                         | 2                   | 0                         | 0                   | NT                        | NT                  | NT                        | NT                  | NT                        | NT                  |
|                              | 466 | 0                         | 0                   | 4                         | 2                   | 0                         | 0                   | 0                         | 0                   | 4                         | 2                   | 2                         | 1                   |
|                              | 467 | 0                         | 0                   | 4                         | 2                   | 0                         | 0                   | NT                        | NT                  | NT                        | NT                  | NT                        | NT                  |
|                              | 610 | 0                         | 0                   | 4                         | 3                   | 0                         | 0                   | 0                         | 0                   | 4                         | 3                   | 1                         | 3                   |
|                              | 641 | 0                         | 0                   | 4                         | 3                   | 0                         | 0                   | 0                         | 0                   | 4                         | 3                   | NT                        | NT                  |

\*Scoring as shown in Supplementary Table 3

58  
59  
60

**Supplementary Table 4b. IF score\* for markers of combined small cell lung cancer (C-SCLC) of *Trp53<sup>fl/fl</sup>;p16<sup>fl/fl</sup>;Nrf2<sup>E79Q/+</sup>* and *Trp53<sup>fl/fl</sup>;p16<sup>fl/fl</sup>;Nrf2<sup>+/+</sup>* mice.**

| Experimental Group           | ID  | ASCL1                     |                     | SYP                       |                     | CHG-A                     |                     | Phospho-HH3               |                     |
|------------------------------|-----|---------------------------|---------------------|---------------------------|---------------------|---------------------------|---------------------|---------------------------|---------------------|
|                              |     | Positively Labelled Cells | Labelling Intensity |
| <i>Nrf2<sup>+/+</sup></i>    | 444 | 4                         | 2                   | 3                         | 2                   | 2                         | 1                   | 3                         | 3                   |
|                              | 445 | 3                         | 2                   | 2                         | 1                   | 1                         | 1                   | 3                         | 3                   |
|                              | 458 | 4                         | 3                   | 4                         | 2                   | 1                         | 1                   | 4                         | 3                   |
| <i>Nrf2<sup>E79Q/+</sup></i> | 428 | 4                         | 3                   | 3                         | 3                   | 3                         | 2                   | 4                         | 3                   |
|                              | 466 | 4                         | 3                   | 3                         | 2                   | 2                         | 1                   | 4                         | 3                   |
|                              | 610 | 4                         | 3                   | 4                         | 3                   | 3                         | 2                   | 4                         | 3                   |

\*Scoring as shown in Supplementary Table 3

61  
62

63  
64  
65  
66  
67

**Supplementary Table 5a. IHC score\* of markers of pure small cell lung cancer (P-SCLC) of *Trp53<sup>fl/fl</sup>;p16<sup>fl/fl</sup>;Nrf2<sup>E79Q/+</sup>* and *Trp53<sup>fl/fl</sup>;p16<sup>fl/fl</sup>;Nrf2<sup>+/+</sup>* mice; NT: No Tissue**

| Experimental Group           | ID  | NRF2                      |                     | P63                       |                           | NKX2-1                    |                     | CGRP                      |                     | Phospho-RB1               |                     |    |
|------------------------------|-----|---------------------------|---------------------|---------------------------|---------------------------|---------------------------|---------------------|---------------------------|---------------------|---------------------------|---------------------|----|
|                              |     | Positively Labelled Cells | Labelling Intensity | Positively Labelled Cells | Positively Labelled Cells | Positively Labelled Cells | Labelling Intensity | Positively Labelled Cells | Labelling Intensity | Positively Labelled Cells | Labelling Intensity |    |
| <i>Nrf2<sup>+/+</sup></i>    | 427 | 0                         | 0                   | 0                         | 3                         | 3                         | 3                   | 3                         | 3                   | 3                         | 1                   | 2  |
| <i>Nrf2<sup>E79Q/+</sup></i> | 114 | 3                         | 2                   | NT                        | NT                        | NT                        | NT                  | NT                        | NT                  | NT                        | NT                  | NT |
|                              | 429 | 2                         | 2                   | 2                         | 4                         | 4                         | 3                   | 3                         | 3                   | NT                        | NT                  | NT |
|                              | 439 | 3                         | 2                   | 0                         | 3                         | 3                         | 3                   | 4                         | 3                   | NT                        | NT                  | NT |
|                              | 460 | 0                         | 1                   | 0                         | 4                         | 4                         | 3                   | 4                         | 3                   | NT                        | NT                  | NT |
|                              | 483 | 4                         | 1                   | 0                         | 4                         | 4                         | 3                   | 3                         | 3                   | 4                         | 2                   | 2  |
|                              | 618 | 0                         | 1                   | 0                         | 3                         | 3                         | 3                   | 4                         | 3                   | 4                         | 2                   | 2  |
|                              | 641 | 2                         | 2                   | 1                         | NT                        | NT                        | 3                   | NT                        | NT                  | NT                        | NT                  | NT |

\*Scoring as shown in Supplementary Table 3

68  
69  
70  
71  
72

**Supplementary Table 5b. IF score\* of markers of pure small cell lung cancer (P-SCLC) of *Trp53<sup>fl/fl</sup>;p16<sup>fl/fl</sup>;Nrf2<sup>E79Q/+</sup>* and *Trp53<sup>fl/fl</sup>;p16<sup>fl/fl</sup>;Nrf2<sup>+/+</sup>* mice.**

| Experimental Group           | ID  | ASCL1                     |                     | SYP                       |                     | Phospho-HH3               |                     |
|------------------------------|-----|---------------------------|---------------------|---------------------------|---------------------|---------------------------|---------------------|
|                              |     | Positively Labelled Cells | Labelling Intensity | Positively Labelled Cells | Labelling Intensity | Positively Labelled Cells | Labelling Intensity |
| <i>Nrf2<sup>+/+</sup></i>    | 427 | 4                         | 3                   | 3                         | 2                   | 1                         | 3                   |
| <i>Nrf2<sup>E79Q/+</sup></i> | 483 | 4                         | 3                   | 2                         | 1                   | 1                         | 2                   |
|                              | 618 | 4                         | 3                   | 2                         | 1                   | 1                         | 3                   |

\*Scoring as shown in Supplementary Table 3

73  
74  
75
